# Supplementary material for: PDA-assisted formation of ordered intermetallic CoPt3 catalysts with enhanced oxygen reduction activity and stability
Source: Royal Society of Chemistry journal article supplement (doi:10.1039/c8nr02207k), 2018-01-01
Supplement: c8nr02207k1.pdf [file c8nr02207k1.pdf]

## Supporting Information

PDA-assisted formation of ordered intermetallic CoPt<sub>3</sub> catalysts with enhanced oxygen reduction activity and stability

*Yige Zhao, Chen Wang, Jingjun Liu\* and Feng Wang\**

State Key Laboratory of Chemical Resource Engineering, Beijing Key Laboratory of Electrochemical Process and Technology for Materials, Beijing University of Chemical Technology, Beijing 100029 (China)

### Corresponding Author

\*E-mail: liujingjun@mail.buct.edu.cn; wangf@mail.buct.edu.cn

Tel: +86-10-64411301;

Fax: +86-10-64411301

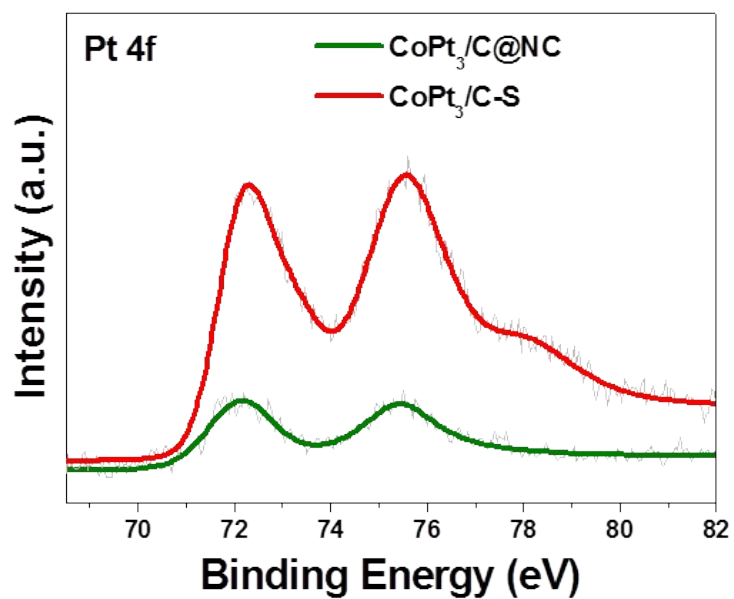

**Figure S1.** Pt 4f XPS spectra for the CoPt<sub>3</sub>/C@NC and CoPt<sub>3</sub>/C-S samples.

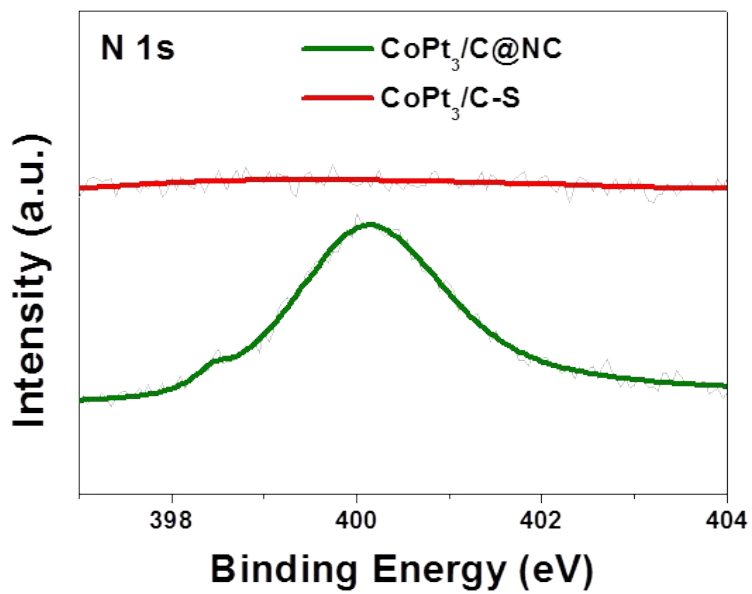

**Figure S2.** N 1s XPS spectra for the CoPt<sub>3</sub>/C@NC and CoPt<sub>3</sub>/C-S samples.

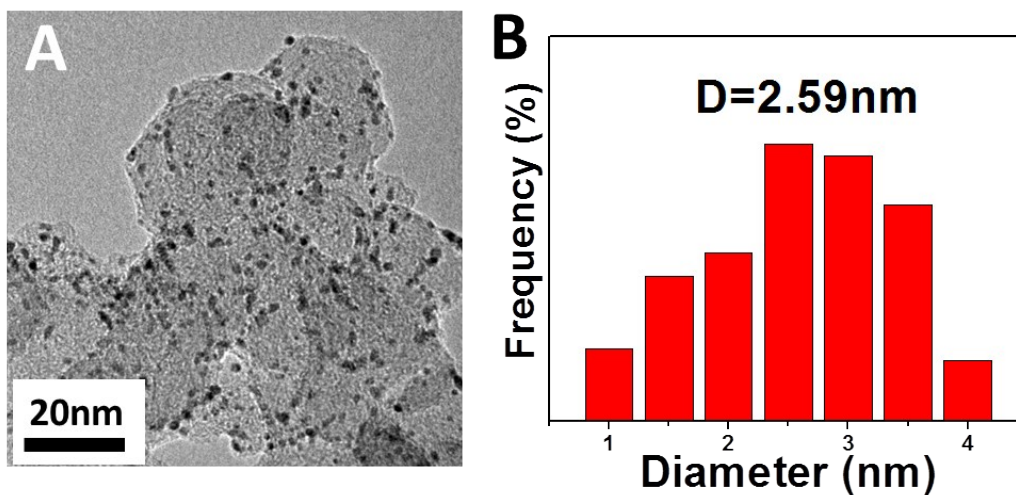

**Figure S3.** (A) TEM image of Pt-Co/C sample; (B) the particle size distribution.

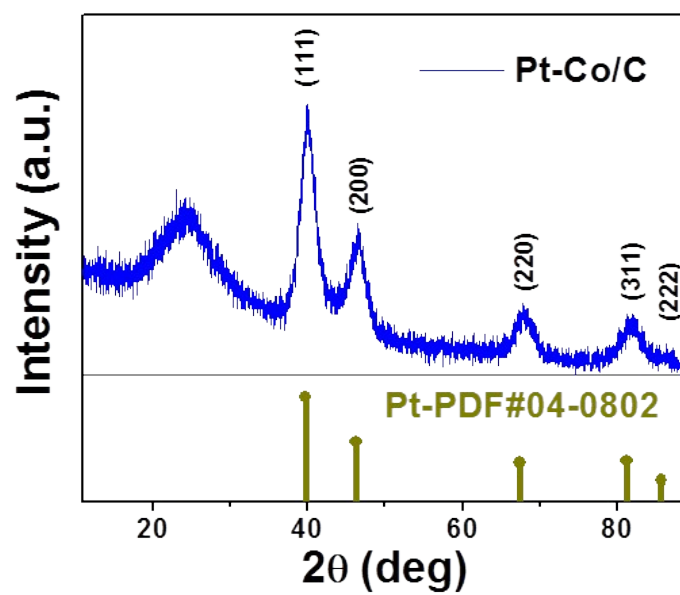

**Figure S4.** XRD spectrum of the disordered Pt-Co/C alloy.

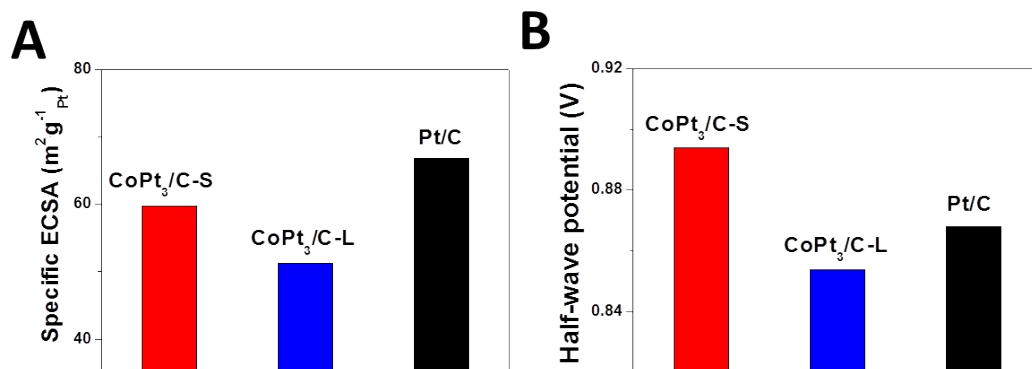

**Figure S5.** (A) The calculated specific ECSA values for CoPt<sub>3</sub>/C-S, CoPt<sub>3</sub>/C-L and Pt/C catalysts; (B) half-wave potentials of these catalysts.

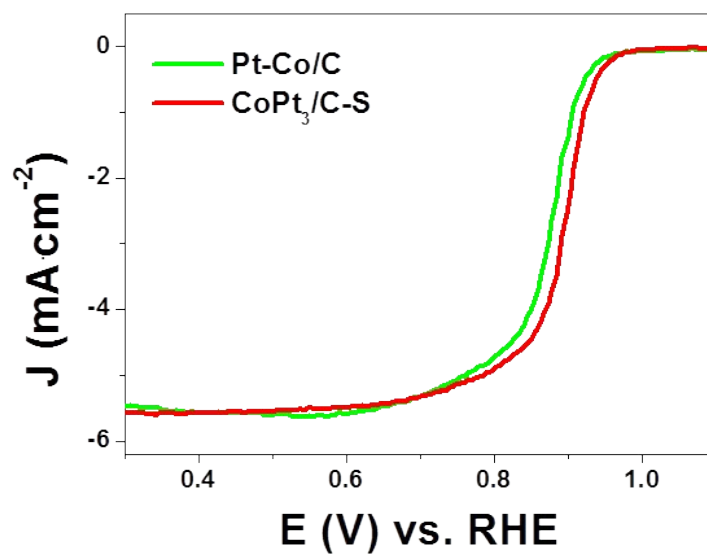

**Figure S6.** ORR polarization curves recorded in O<sub>2</sub>-saturated 0.1 M KOH solution with a sweep rate of 10 mV s<sup>-1</sup> at 1600 rpm.

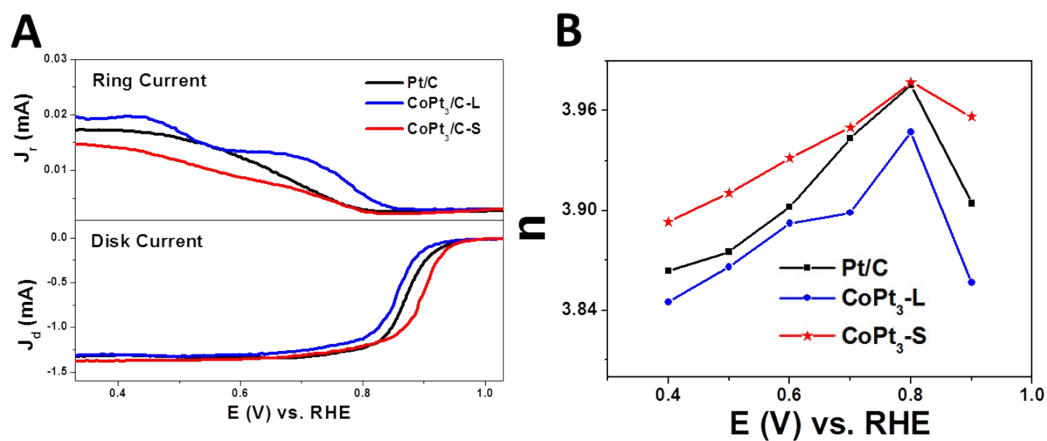

**Figure S7.** (A) Rotating ring-disk electrode tests measured in O<sub>2</sub>-saturated 0.1 M KOH solution at 1600 rpm; (B) the transferred electrons numbers during ORR.

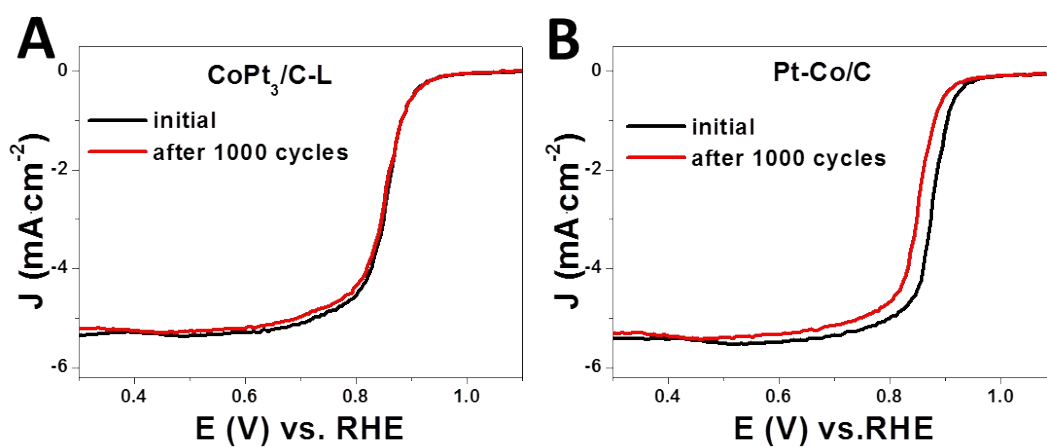

**Figure S8.** (A-B) ORR polarization curves before and after 1000 cycles.

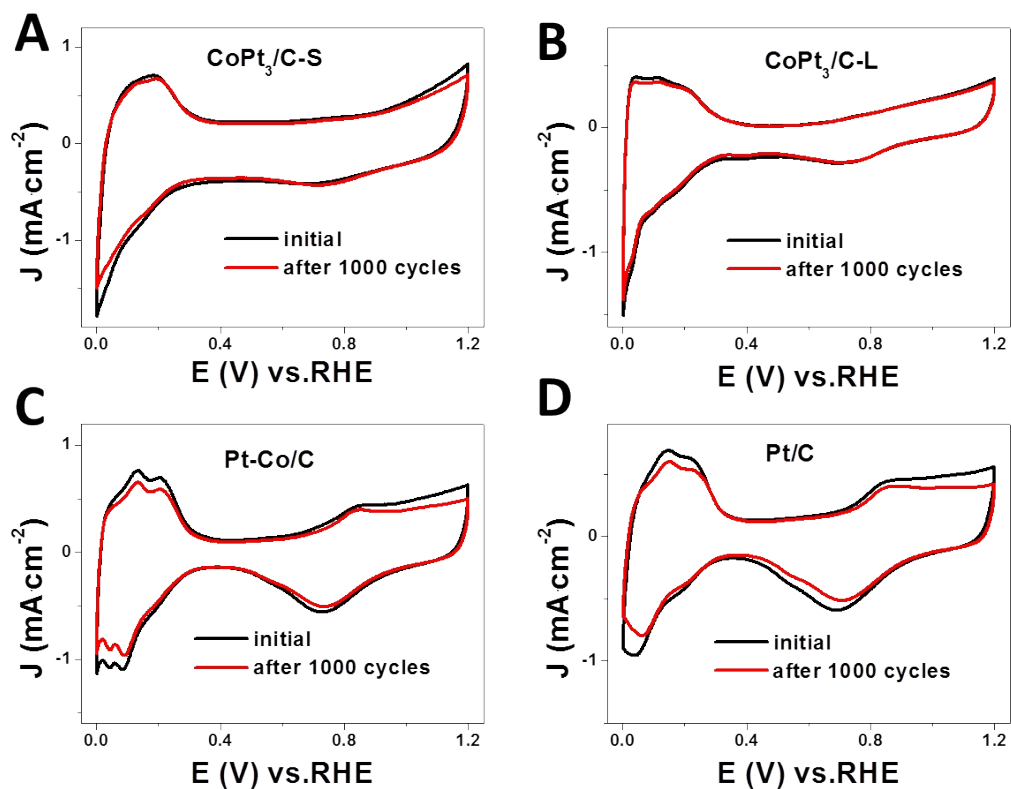

**Figure S9.** (A-D) CV curves before and after 1000 cycles recorded in N<sub>2</sub>-purged 0.1 M HClO<sub>4</sub> solution with a sweep rate of 100 mV s<sup>-1</sup>.

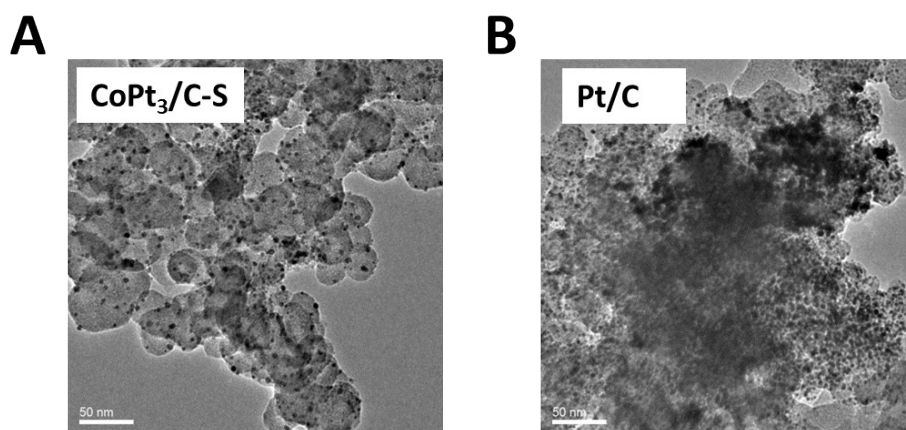

**Figure S10.** (A-B) TEM images of CoPt<sub>3</sub>/C-S and Pt/C samples after 1000 cycles.

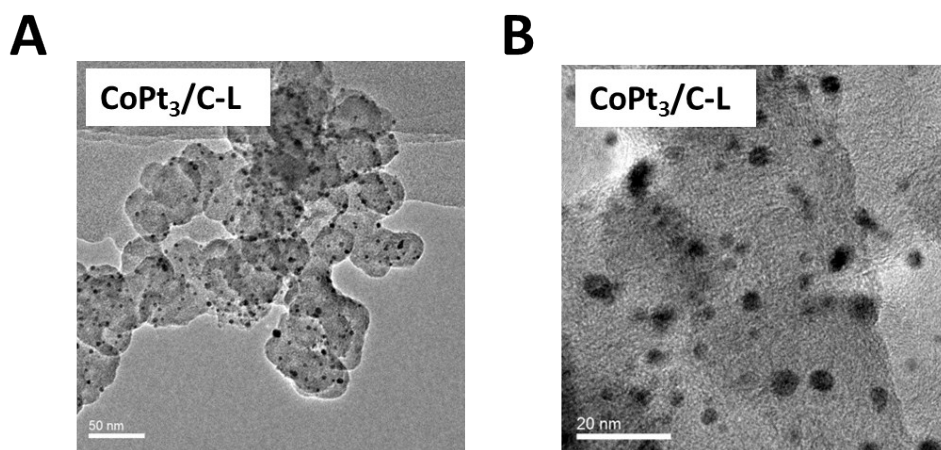

**Figure S11.** (A-B) TEM images of CoPt<sub>3</sub>/C-L sample after 1000 cycles.

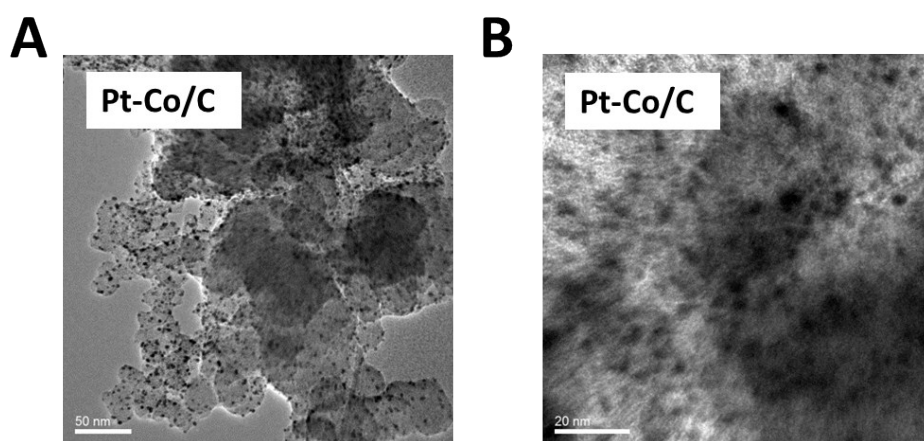

**Figure S12.** (A-B) TEM images of Pt-Co/C sample after 1000 cycles.

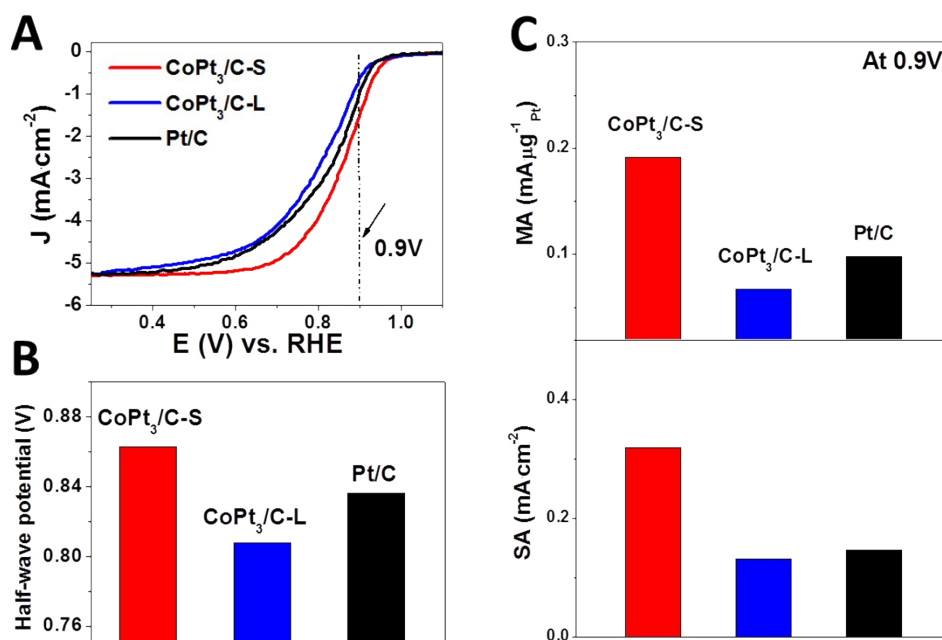

**Figure S13.** (A) ORR polarization curves recorded in O<sub>2</sub>-saturated 0.1 M HClO<sub>4</sub> solution with a sweep rate of 10 mV s<sup>-1</sup> at 1600 rpm; (B) the calculated half-wave potentials; (C) mass activities and specific activities of these catalysts.

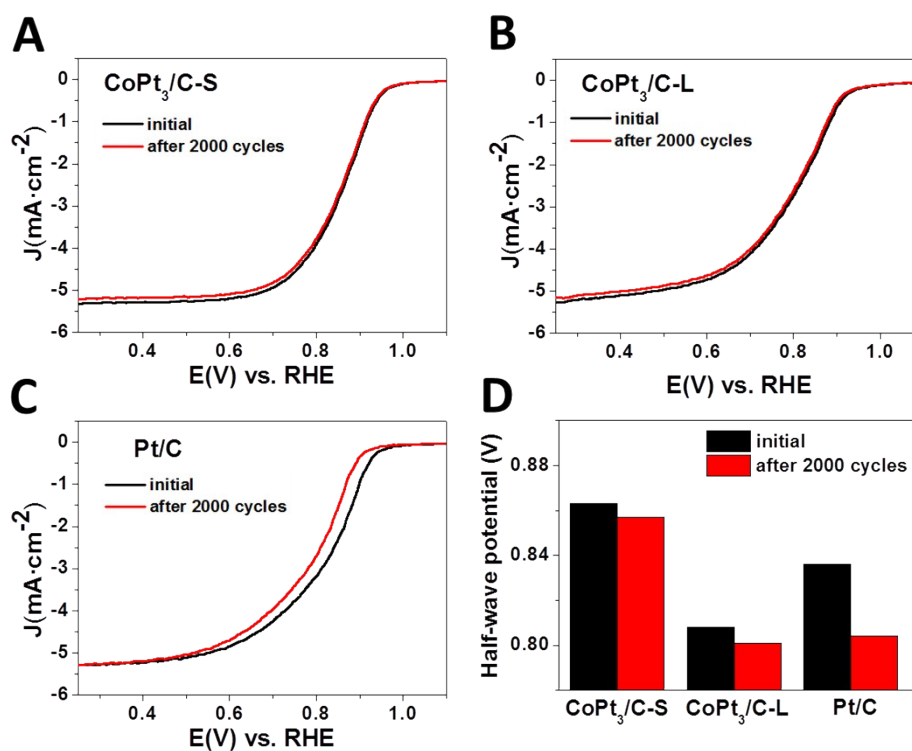



**Figure S14.** (A-C) ORR polarization curves before and after 2000 cycles for CoPt<sub>3</sub>/C-S (A), CoPt<sub>3</sub>/C-L (B) and Pt/C (C) catalysts; **(D)** the comparisons of half-wave potentials before and after 2000 cycles for these catalysts.
